# Supplementary material for: Shedding dynamics of Morogoro virus, an African arenavirus closely related to Lassa virus, in its natural reservoir host Mastomys natalensis
Source: PubMed Central journal article supplement (PMC4448520; doi:10.1038/srep10445), 2015-05-29
Supplement: srep10445-s1.pdf [file srep10445-s1.pdf]

**Supplementary Information:**

**Shedding dynamics of Morogoro virus, an African arenavirus closely related to  
Lassa virus, in its natural reservoir host *Mastomys natalensis***

**Benny Borremans<sup>1</sup>, Raphaël Vossen<sup>1</sup>, Beate Becker-Ziaja<sup>2</sup>, Sophie Gryseels<sup>1</sup>, Nelika Hughes<sup>1</sup>,  
Mats Van Gestel<sup>1</sup>, Natalie Van Houtte<sup>1</sup>, Stephan Günther<sup>2</sup>, Herwig Leirs<sup>1</sup>**

<sup>1</sup>Evolutionary Ecology Group, University of Antwerp, Antwerp, Belgium

<sup>2</sup>Bernhard-Nocht-Institute for Tropical Medicine, Hamburg, Germany

Corresponding author: B.B. (benny.borremans@uantwerpen.be)

### Inhibition test

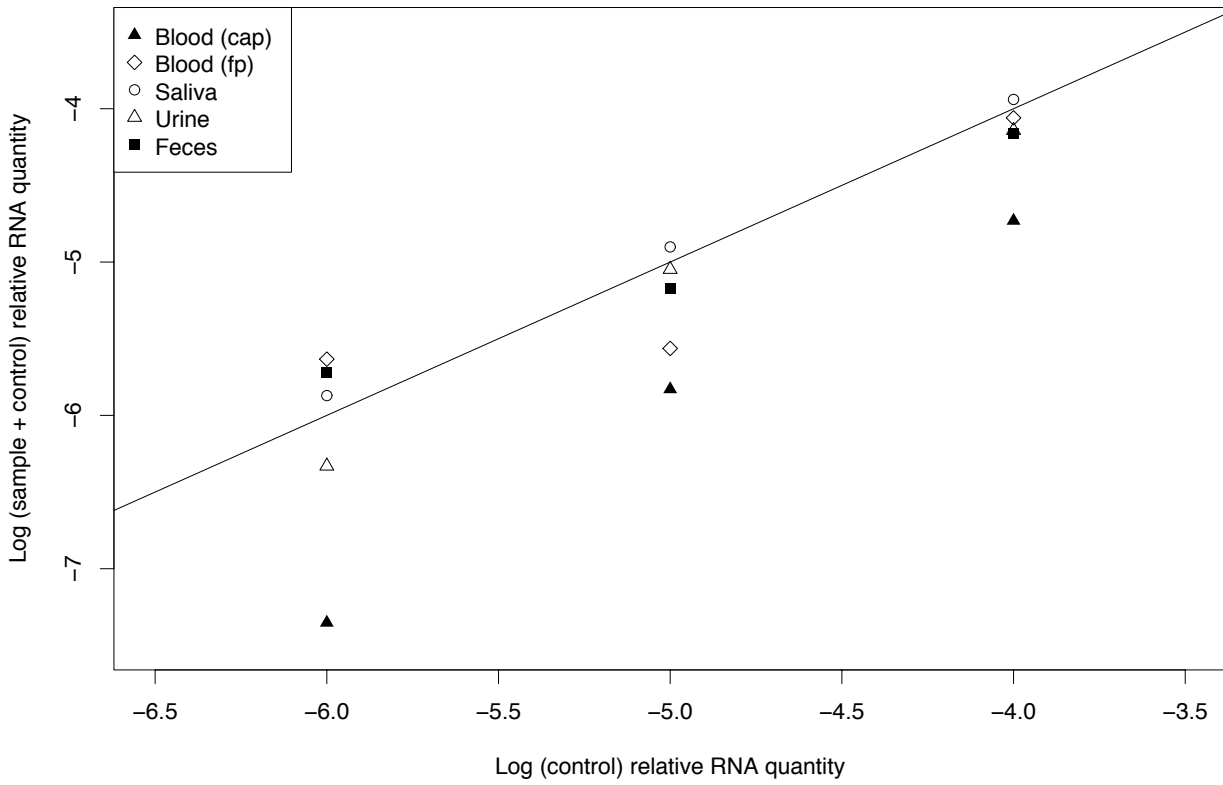

**Figure 1.** Inhibition test results for blood from capillaries (cap) and filter paper (fp), saliva, urine and feces. The line shows the estimated standard curve as a reference.

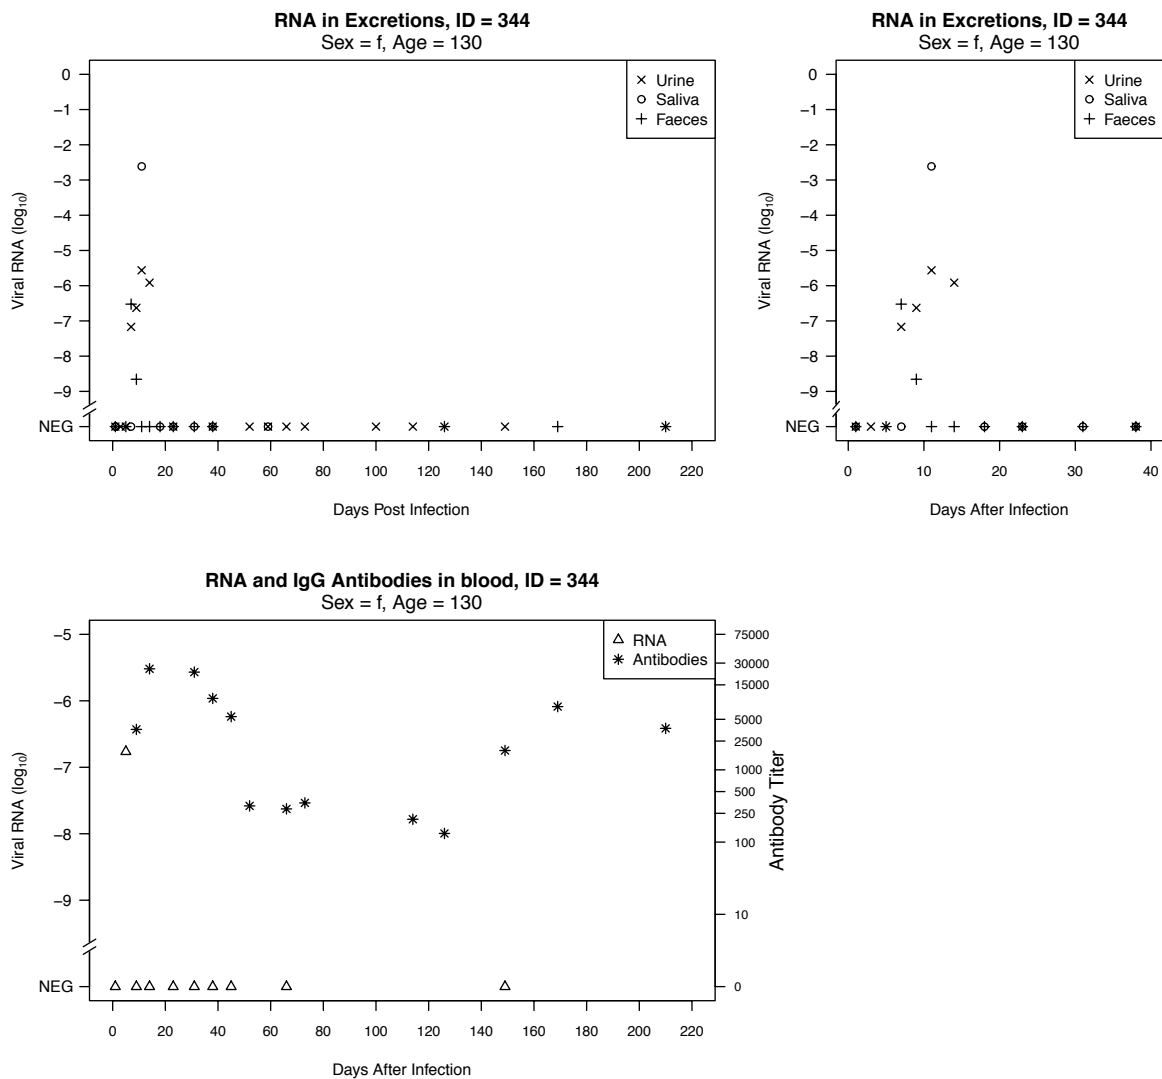

**Figure 2.** Antibody titers (blood) and MORV RNA (blood, excretions) for individual 1 of 15. Relative RNA levels are log-transformed ( $\log_{10}$  [RNA level]) to improve plot interpretation. A value of -6 corresponds with the RNA level of a  $10^{-6}$  dilution of the standard RNA (used for relative quantification) extracted from a  $10^6$  FFU/mL virus stock, and would thus correspond with a concentration of 1 FFU/mL.

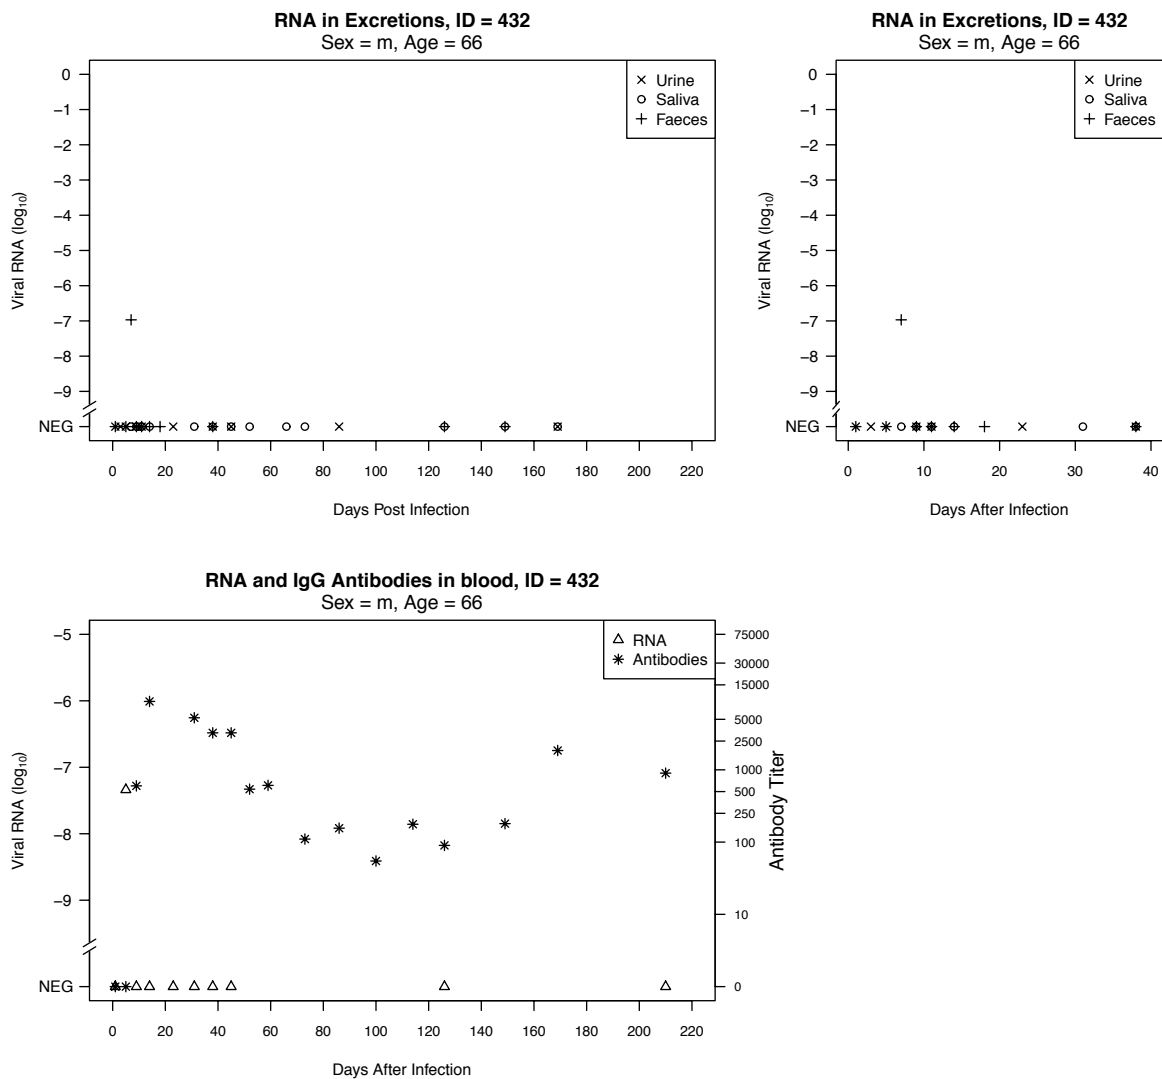

**Figure 3.** Antibody titers (blood) and MORV RNA (blood, excretions) for individual 2 of 15. Relative RNA levels are log-transformed ( $\log_{10}$  [RNA level]) to improve plot interpretation. A value of -6 corresponds with the RNA level of a  $10^{-6}$  dilution of the standard RNA (used for relative quantification) extracted from a  $10^6$  FFU/mL virus stock, and would thus correspond with a concentration of 1 FFU/mL.

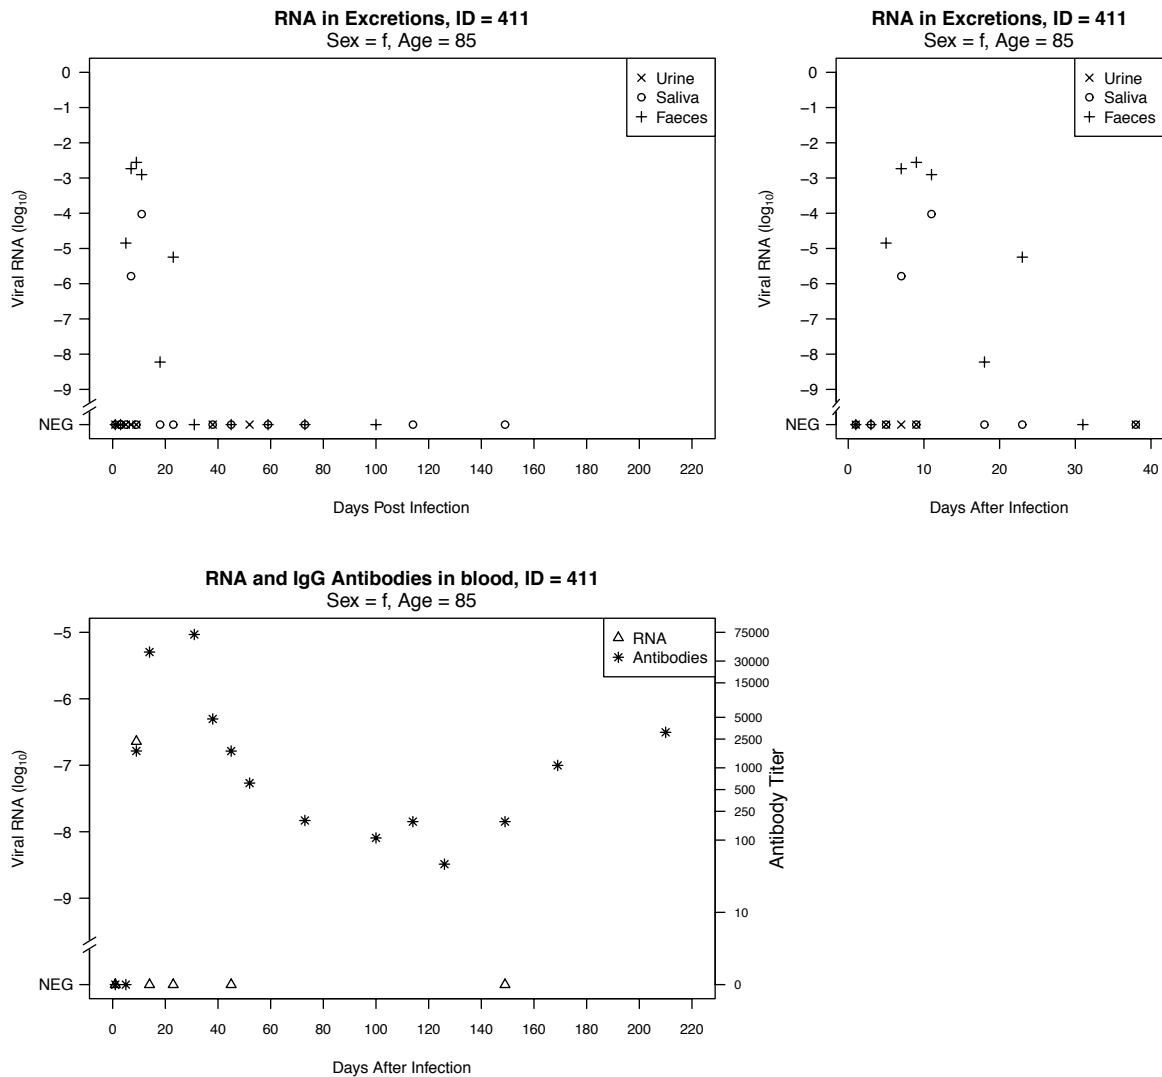

**Figure 4.** Antibody titers (blood) and MORV RNA (blood, excretions) for individual 3 of 15. Relative RNA levels are log-transformed ( $\log_{10}$  [RNA level]) to improve plot interpretation. A value of -6 corresponds with the RNA level of a  $10^{-6}$  dilution of the standard RNA (used for relative quantification) extracted from a  $10^6$  FFU/mL virus stock, and would thus correspond with a concentration of 1 FFU/mL.

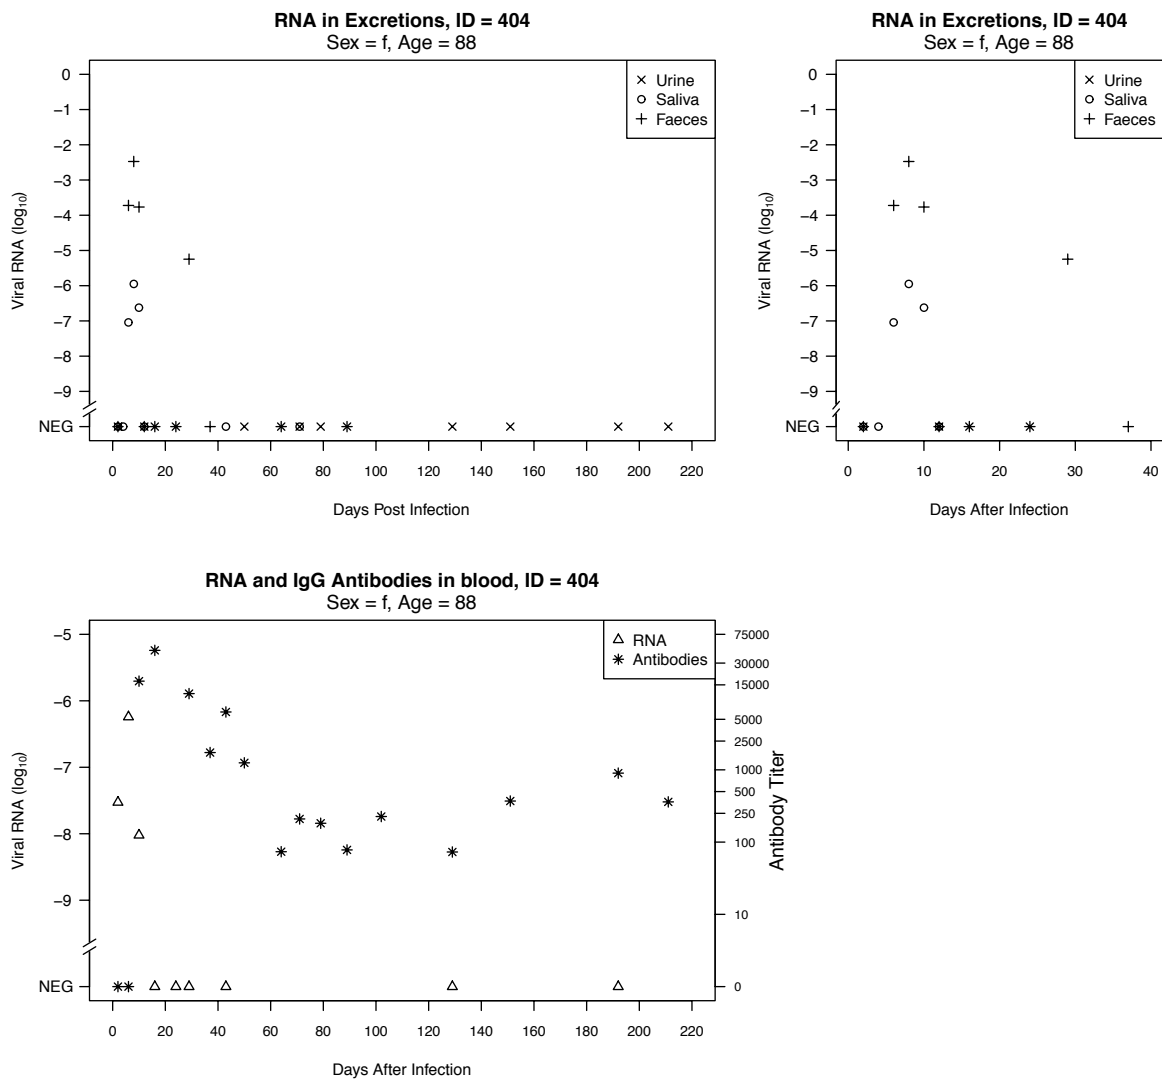

**Figure 5.** Antibody titers (blood) and MORV RNA (blood, excretions) for individual 4 of 15. Relative RNA levels are log-transformed ( $\log_{10}$  [RNA level]) to improve plot interpretation. A value of -6 corresponds with the RNA level of a  $10^{-6}$  dilution of the standard RNA (used for relative quantification) extracted from a  $10^6$  FFU/mL virus stock, and would thus correspond with a concentration of 1 FFU/mL.

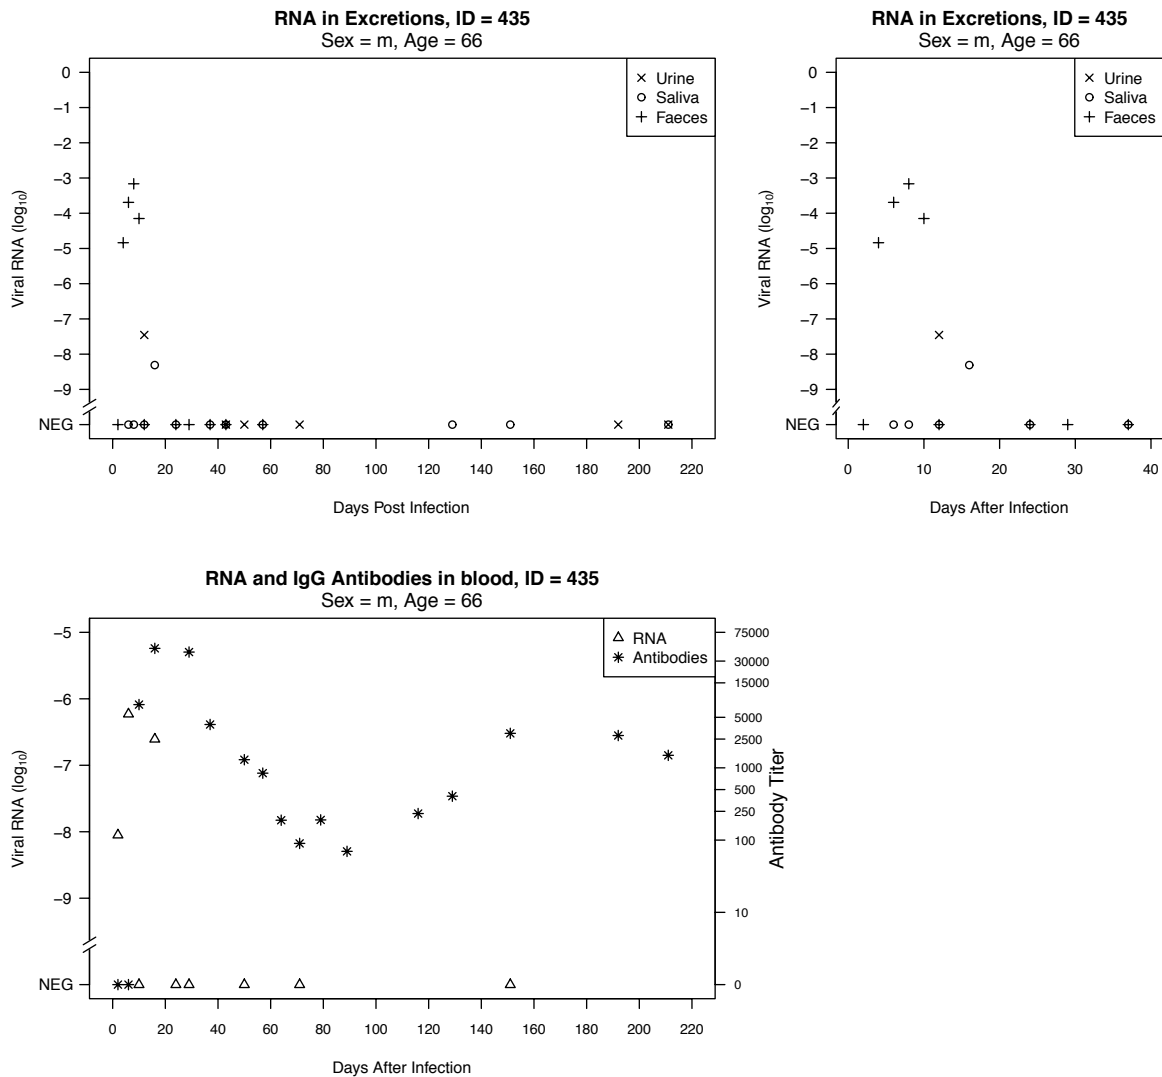

**Figure 6.** Antibody titers (blood) and MORV RNA (blood, excretions) for individual 5 of 15. Relative RNA levels are log-transformed ( $\log_{10}$  [RNA level]) to improve plot interpretation. A value of -6 corresponds with the RNA level of a  $10^{-6}$  dilution of the standard RNA (used for relative quantification) extracted from a  $10^6$  FFU/mL virus stock, and would thus correspond with a concentration of 1 FFU/mL.

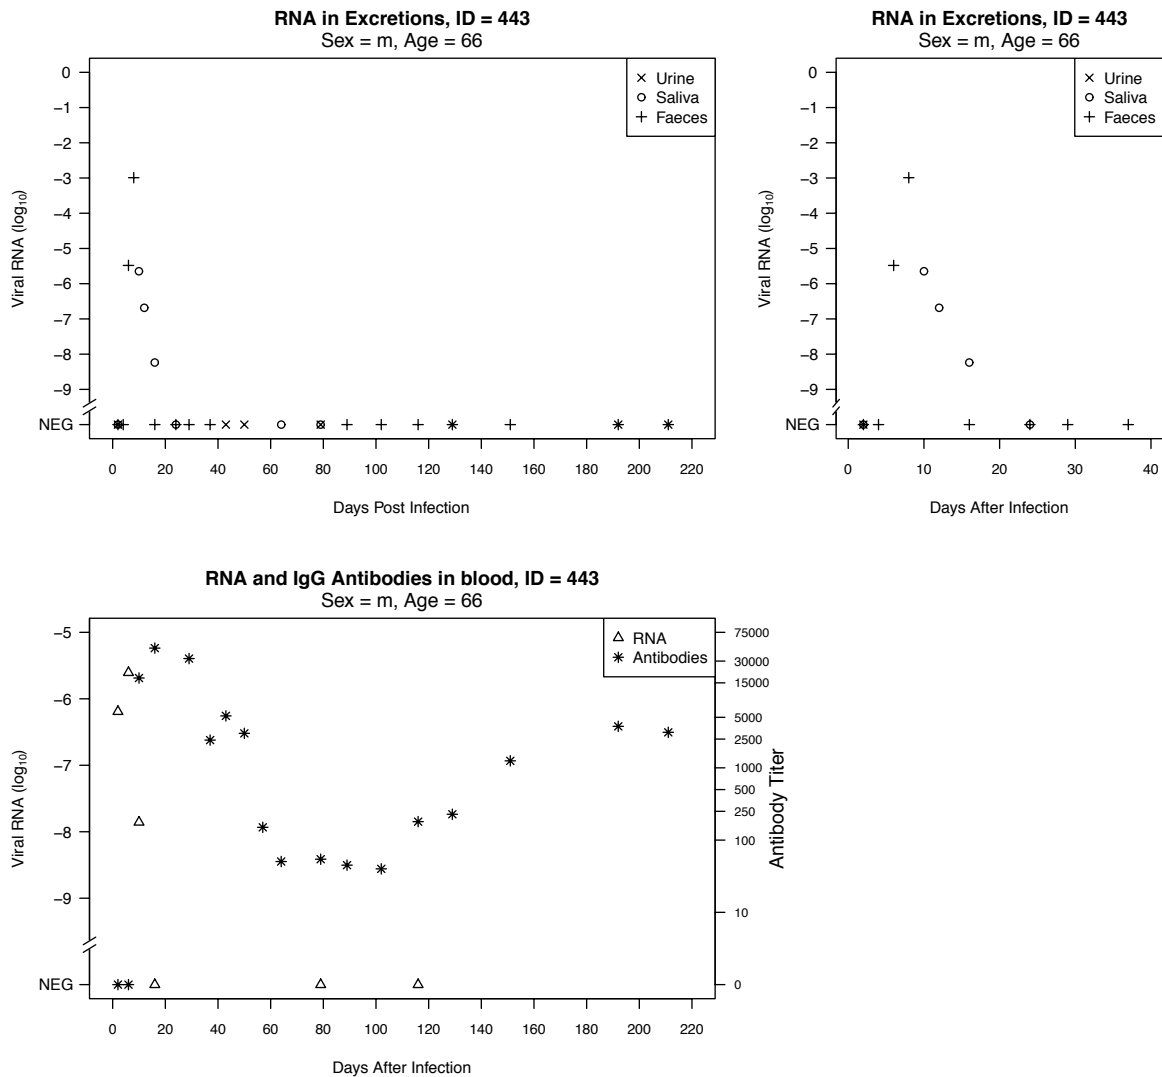

**Figure 7.** Antibody titers (blood) and MORV RNA (blood, excretions) for individual 6 of 15. Relative RNA levels are log-transformed ( $\log_{10}$  [RNA level]) to improve plot interpretation. A value of -6 corresponds with the RNA level of a  $10^{-6}$  dilution of the standard RNA (used for relative quantification) extracted from a  $10^6$  FFU/mL virus stock, and would thus correspond with a concentration of 1 FFU/mL.



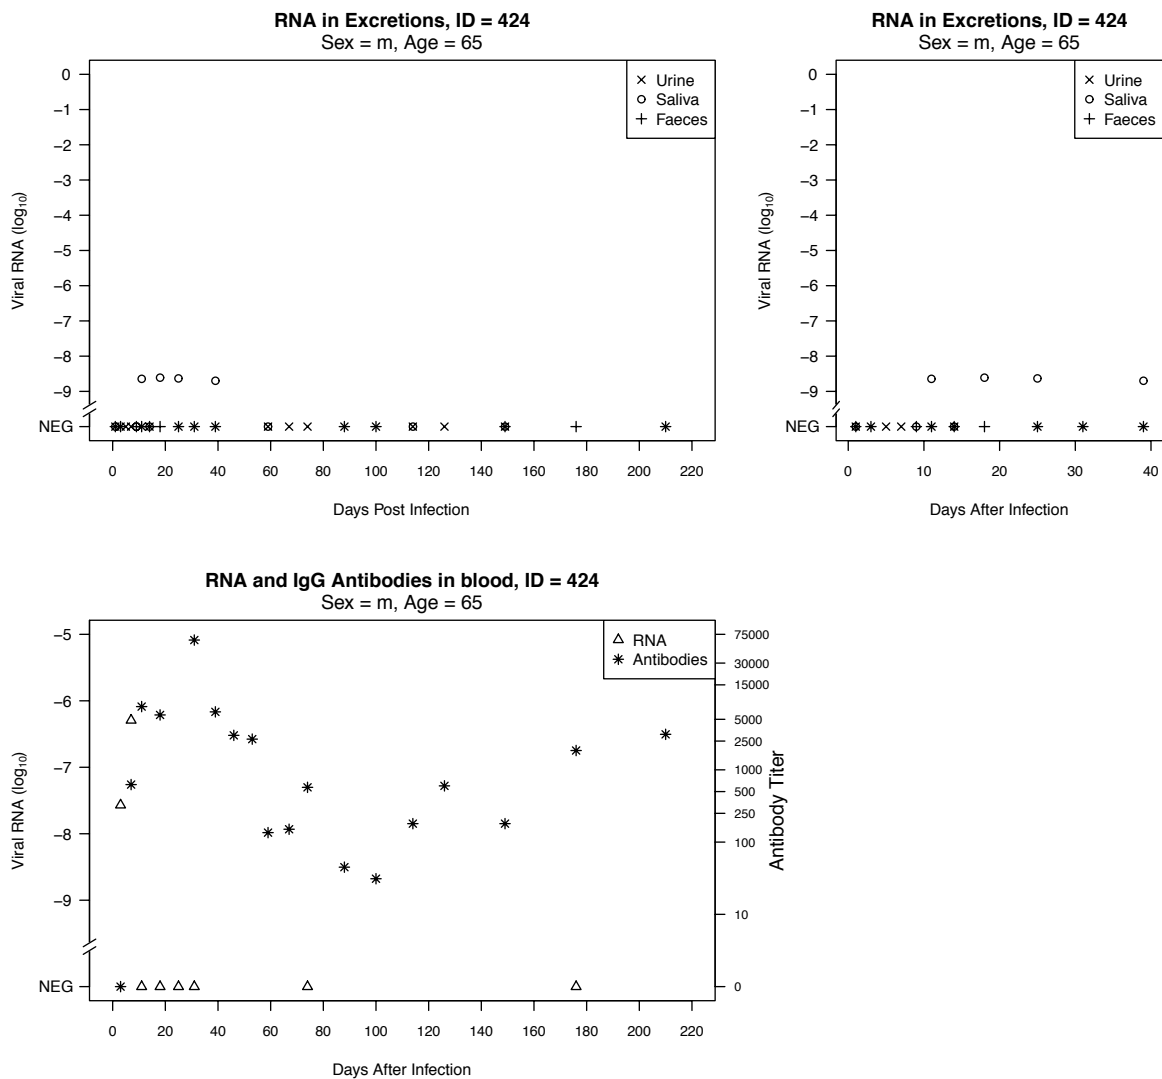

**Figure 8.** Antibody titers (blood) and MORV RNA (blood, excretions) for individual 7 of 15. Relative RNA levels are log-transformed ( $\log_{10}$  [RNA level]) to improve plot interpretation. A value of -6 corresponds with the RNA level of a  $10^{-6}$  dilution of the standard RNA (used for relative quantification) extracted from a  $10^6$  FFU/mL virus stock, and would thus correspond with a concentration of 1 FFU/mL.

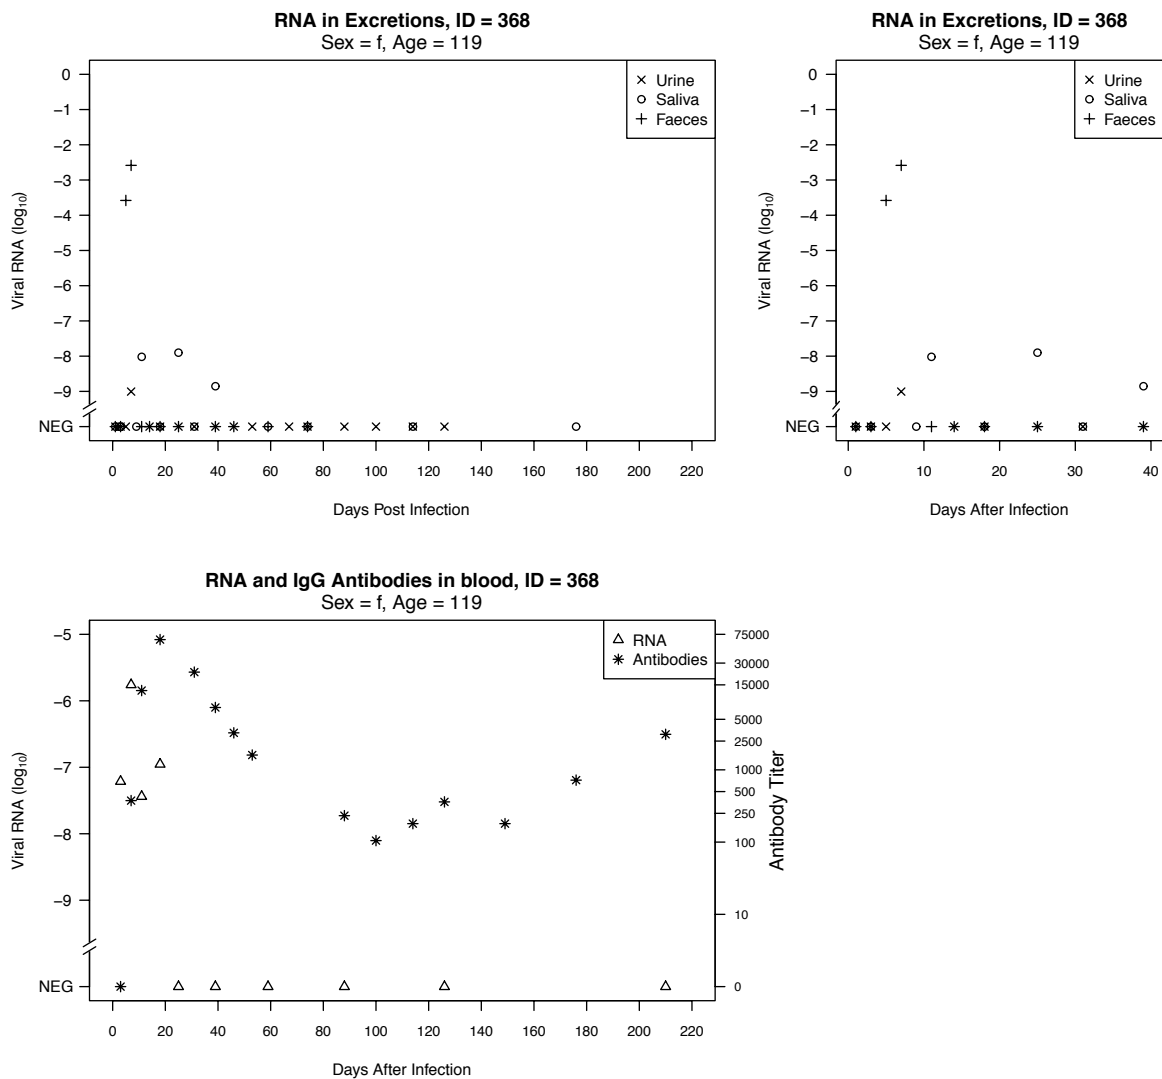

**Figure 9.** Antibody titers (blood) and MORV RNA (blood, excretions) for individual 8 of 15. Relative RNA levels are log-transformed ( $\log_{10}$  [RNA level]) to improve plot interpretation. A value of -6 corresponds with the RNA level of a  $10^{-6}$  dilution of the standard RNA (used for relative quantification) extracted from a  $10^6$  FFU/mL virus stock, and would thus correspond with a concentration of 1 FFU/mL.

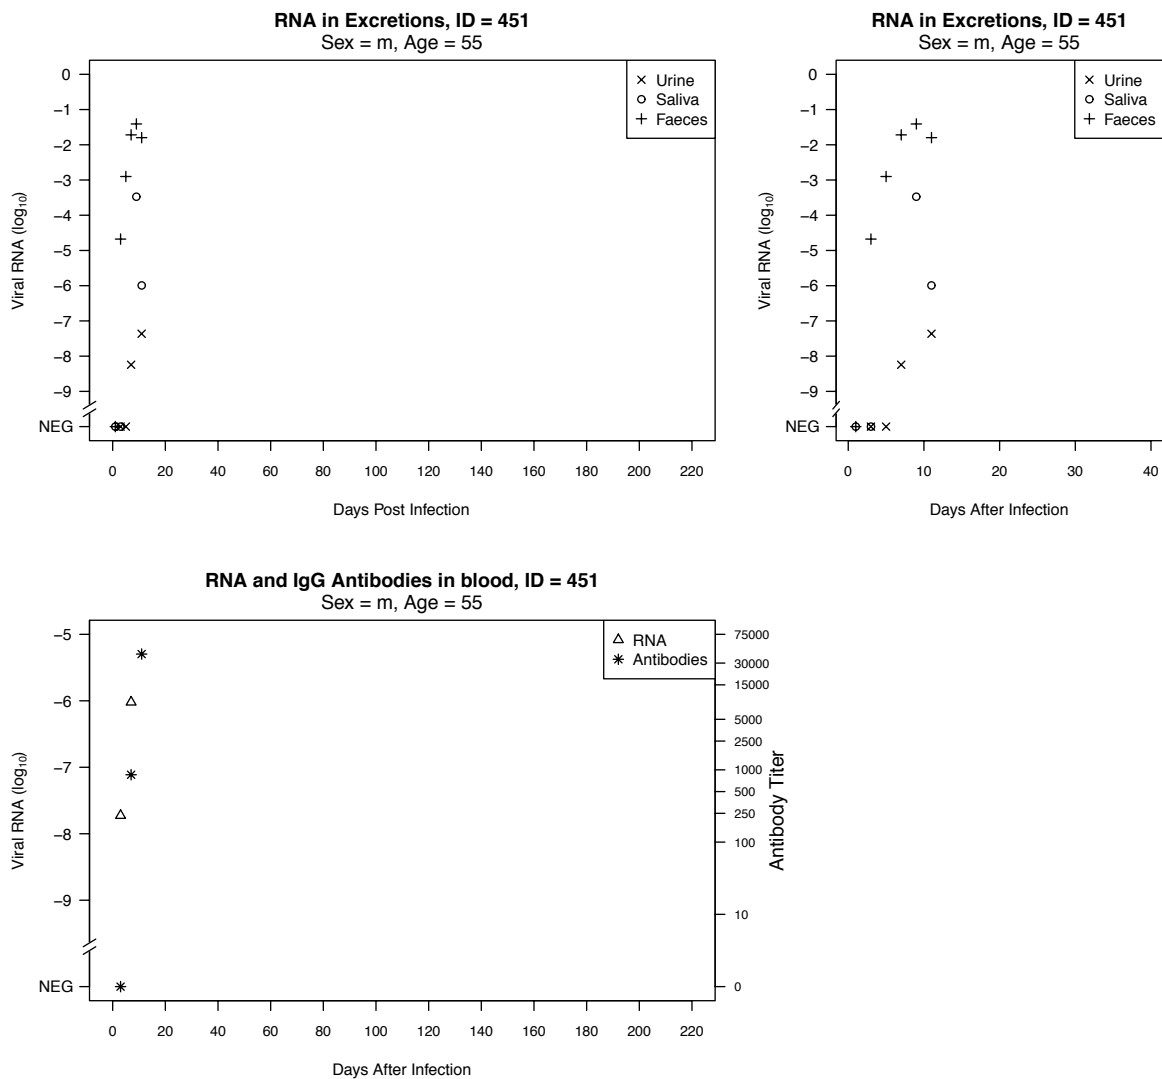

**Figure 10.** Antibody titers (blood) and MORV RNA (blood, excretions) for individual 9 of 15. Relative RNA levels are log-transformed ( $\log_{10}$  [RNA level]) to improve plot interpretation. A value of -6 corresponds with the RNA level of a  $10^6$  dilution of the standard RNA (used for relative quantification) extracted from a  $10^6$  FFU/mL virus stock, and would thus correspond with a concentration of 1 FFU/mL. This individual died on day 11 post-infection due to accidental anesthetic overdose.

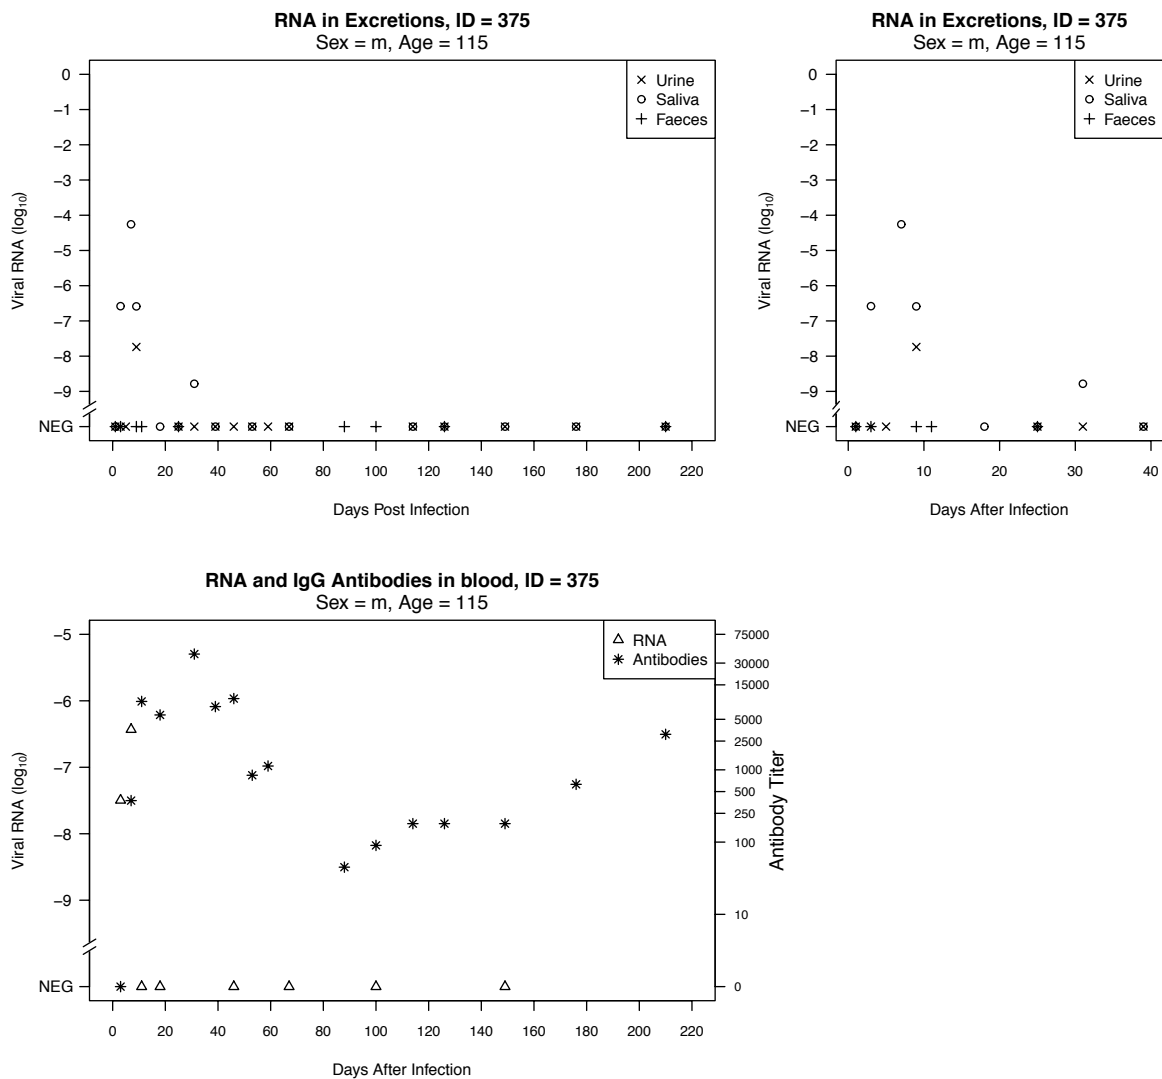

**Figure 11.** Antibody titers (blood) and MORV RNA (blood, excretions) for individual 10 of 15. Relative RNA levels are log-transformed ( $\log_{10} [\text{RNA level}]$ ) to improve plot interpretation. A value of -6 corresponds with the RNA level of a  $10^{-6}$  dilution of the standard RNA (used for relative quantification) extracted from a  $10^6$  FFU/mL virus stock, and would thus correspond with a concentration of 1 FFU/mL.

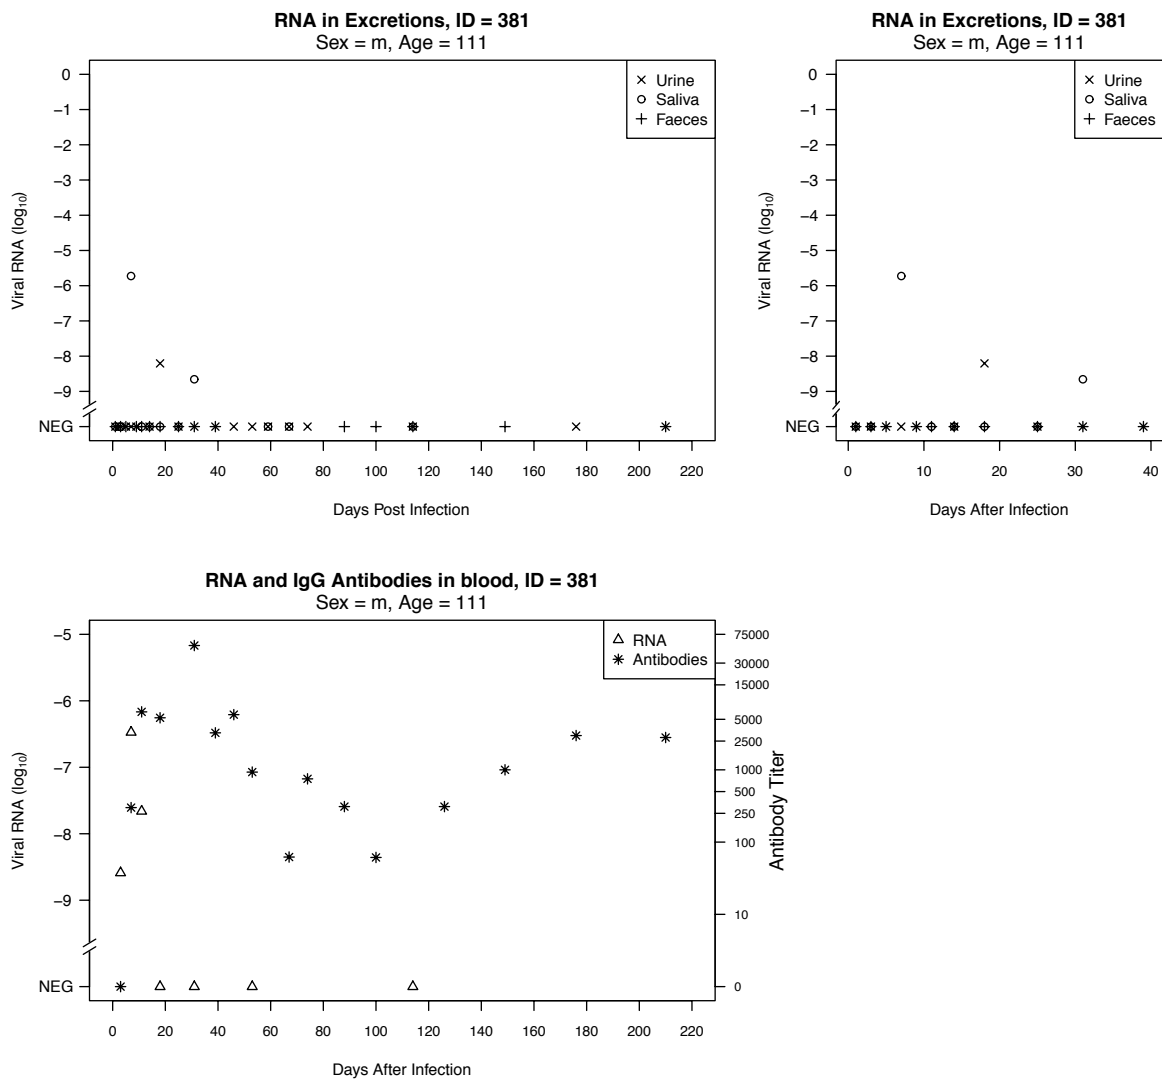

**Figure 12.** Antibody titers (blood) and MORV RNA (blood, excretions) for individual 11 of 15. Relative RNA levels are log-transformed ( $\log_{10}$  [RNA level]) to improve plot interpretation. A value of -6 corresponds with the RNA level of a  $10^{-6}$  dilution of the standard RNA (used for relative quantification) extracted from a  $10^6$  FFU/mL virus stock, and would thus correspond with a concentration of 1 FFU/mL.

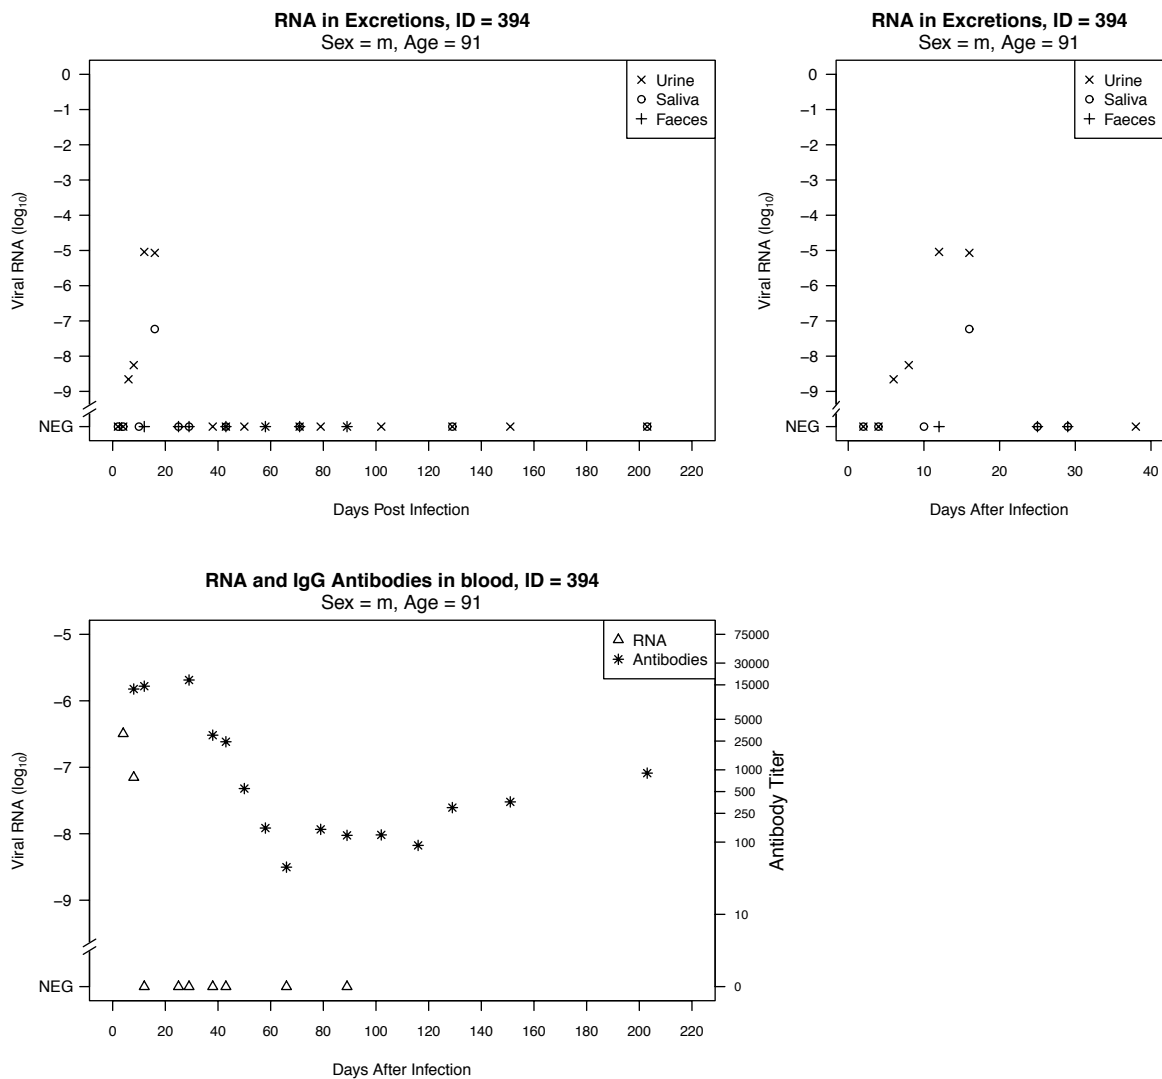

**Figure 13.** Antibody titers (blood) and MORV RNA (blood, excretions) for individual 12 of 15. Relative RNA levels are log-transformed ( $\log_{10} [\text{RNA level}]$ ) to improve plot interpretation. A value of -6 corresponds with the RNA level of a  $10^{-6}$  dilution of the standard RNA (used for relative quantification) extracted from a  $10^6$  FFU/mL virus stock, and would thus correspond with a concentration of 1 FFU/mL.

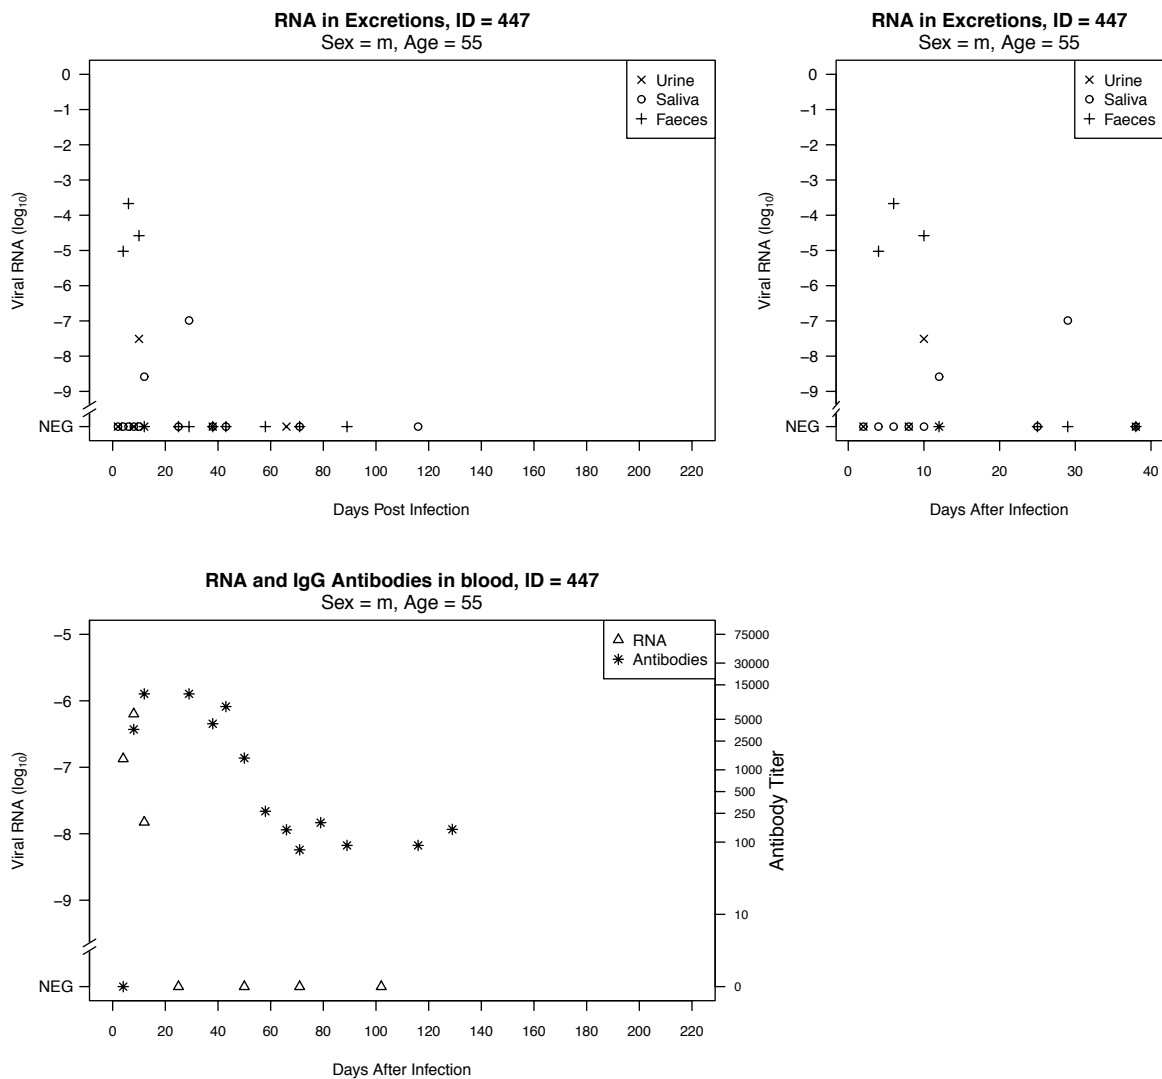

**Figure 14.** Antibody titers (blood) and MORV RNA (blood, excretions) for individual 13 of 15. Relative RNA levels are log-transformed ( $\log_{10}$  [RNA level]) to improve plot interpretation. A value of -6 corresponds with the RNA level of a  $10^{-6}$  dilution of the standard RNA (used for relative quantification) extracted from a  $10^6$  FFU/mL virus stock, and would thus correspond with a concentration of 1 FFU/mL. This individual was euthanized on day 129 post-infection because of ulcer development caused by tail-biting.

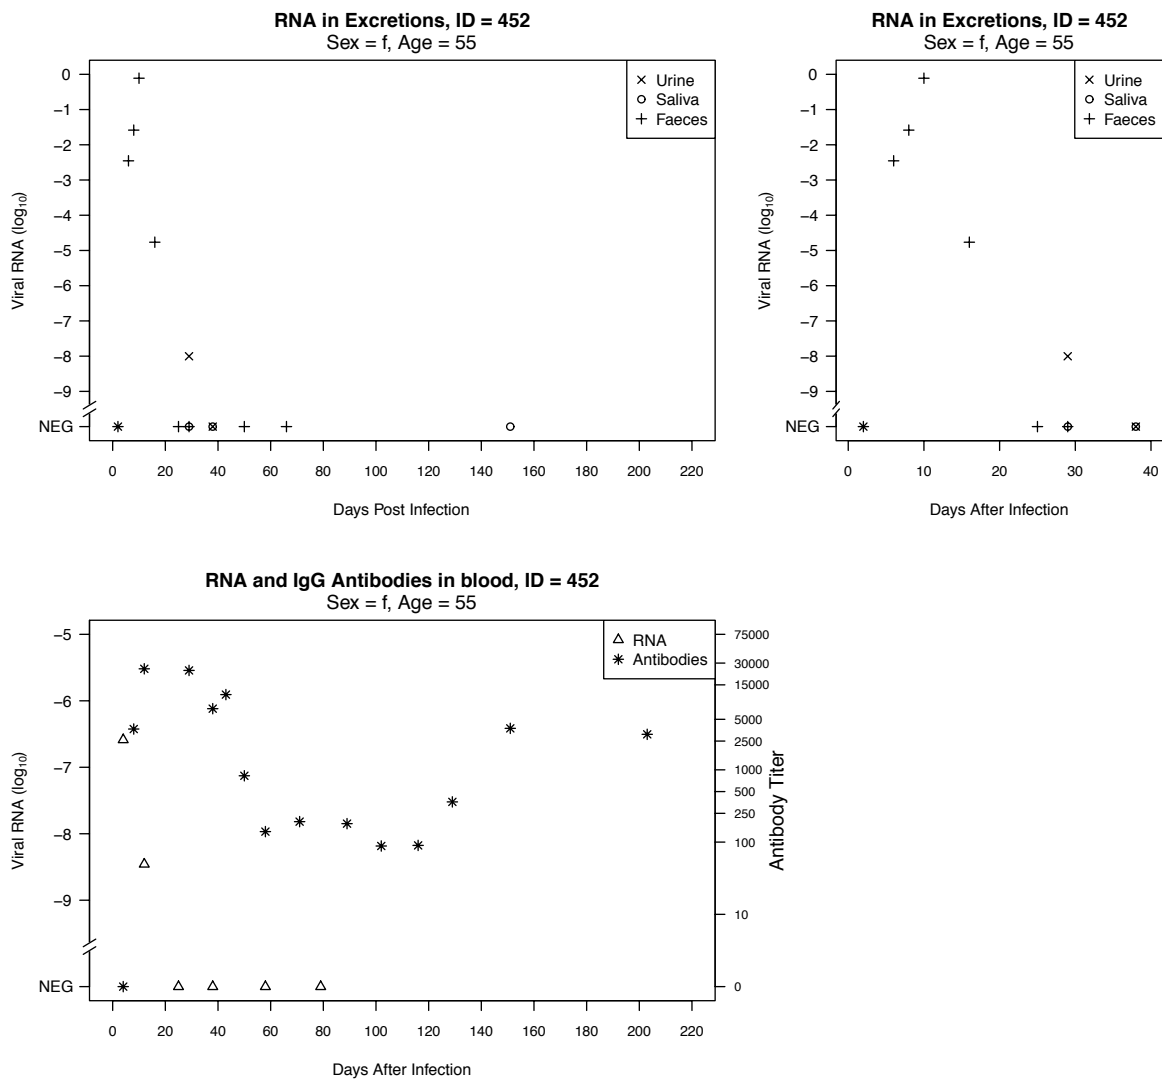

**Figure 15.** Antibody titers (blood) and MORV RNA (blood, excretions) for individual 14 of 15. Relative RNA levels are log-transformed ( $\log_{10}$  [RNA level]) to improve plot interpretation. A value of -6 corresponds with the RNA level of a  $10^6$  dilution of the standard RNA (used for relative quantification) extracted from a  $10^6$  FFU/mL virus stock, and would thus correspond with a concentration of 1 FFU/mL.



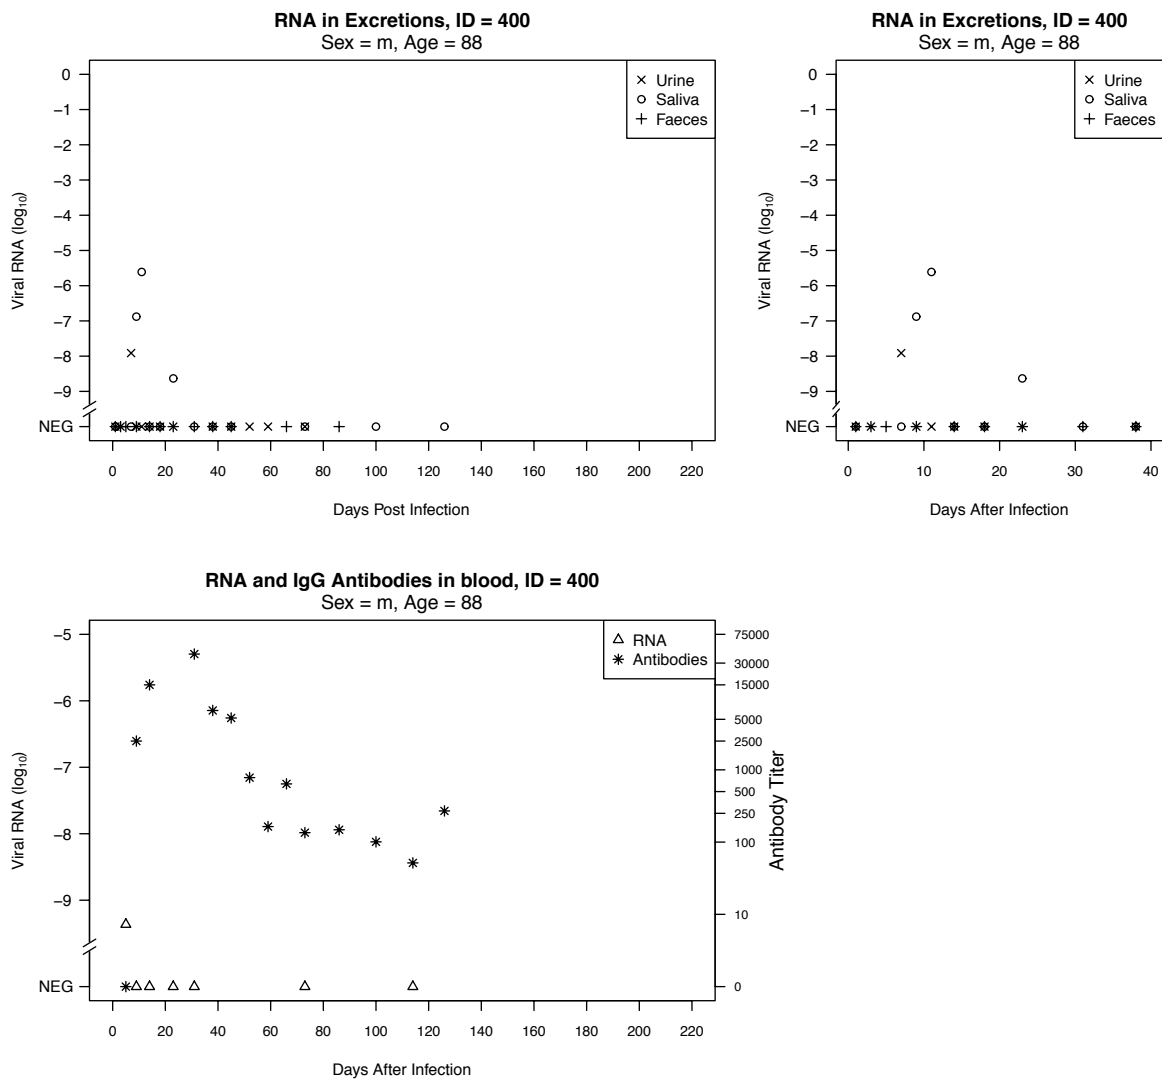

**Figure 16.** Antibody titers (blood) and MORV RNA (blood, excretions) for individual 15 of 15. Relative RNA levels are log-transformed ( $\log_{10}$  [RNA level]) to improve plot interpretation. A value of -6 corresponds with the RNA level of a  $10^{-6}$  dilution of the standard RNA (used for relative quantification) extracted from a  $10^6$  FFU/mL virus stock, and would thus correspond with a concentration of 1 FFU/mL. This individual died naturally on day 149 post-infection.
